# Supplementary material for: Color-tunable luminescent hydrogels with tough mechanical strength and self-healing ability
Source: Royal Society of Chemistry journal article supplement (doi:10.1039/c7tc05593e), 2018-01-01
Supplement: c7tc05593e1.pdf [file c7tc05593e1.pdf]

## **Supporting Information**

### **Color-tunable luminescent hydrogels with tough mechanical strength and self-healing ability**

Daqing Yang, Yige Wang\*, Zhiqiang Li, Yang Xu, Fei Cheng, Peng Li and Huanrong Li\*

School of Chemical Engineering and Technology, Hebei University of Technology

GuangRong Dao 8, Hongqiao Distric, Tianjin 300130 (China)

E-mail: wangyige@hebut.edu.cn, lihuanrong@hebut.edu.cn

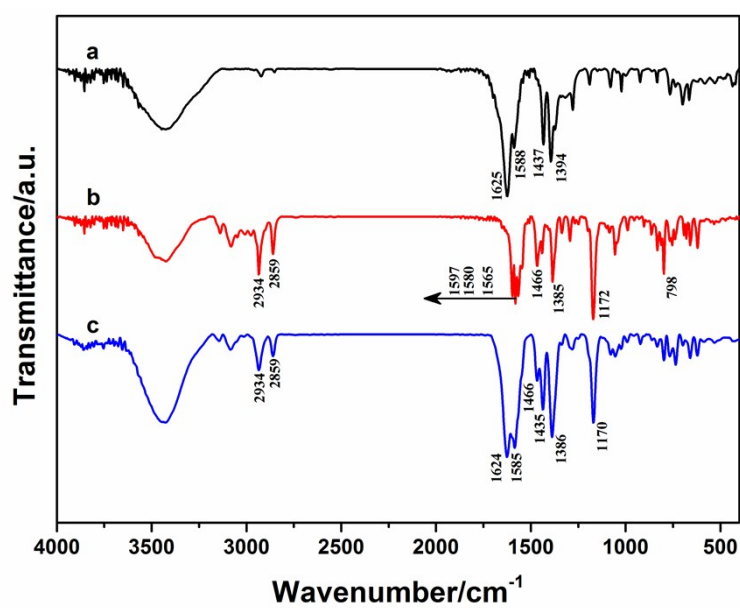

**Figure S1.** FT-IR spectra of Na<sub>3</sub>[Ln(dpa)<sub>3</sub>] (a), tpy-mim<sub>2</sub> (b), and Ln(dpa)<sub>3</sub>-tpy-mim<sub>2</sub> (c).

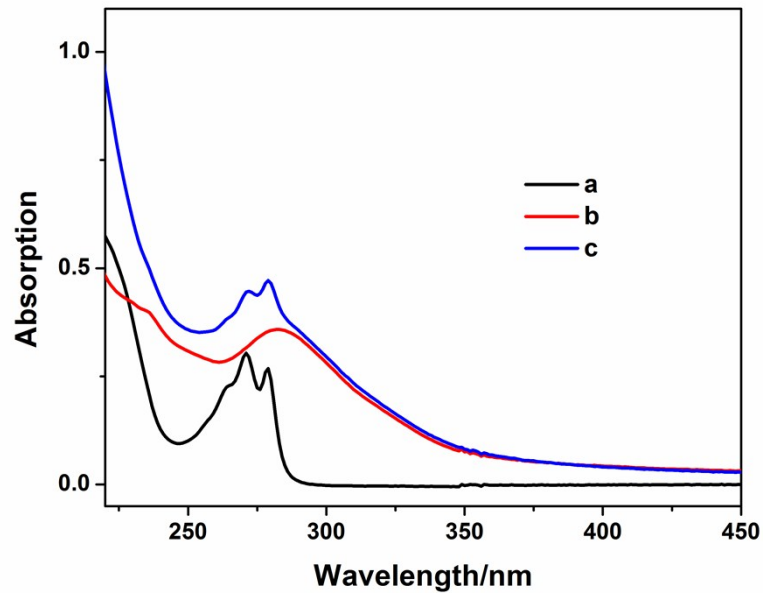

**Figure S2.** UV-Vis absorption spectra of Na<sub>3</sub>[Ln(dpa)<sub>3</sub>] (a), tpy-mim<sub>2</sub> (b), and Ln(dpa)<sub>3</sub>-tpy-mim<sub>2</sub> (c).

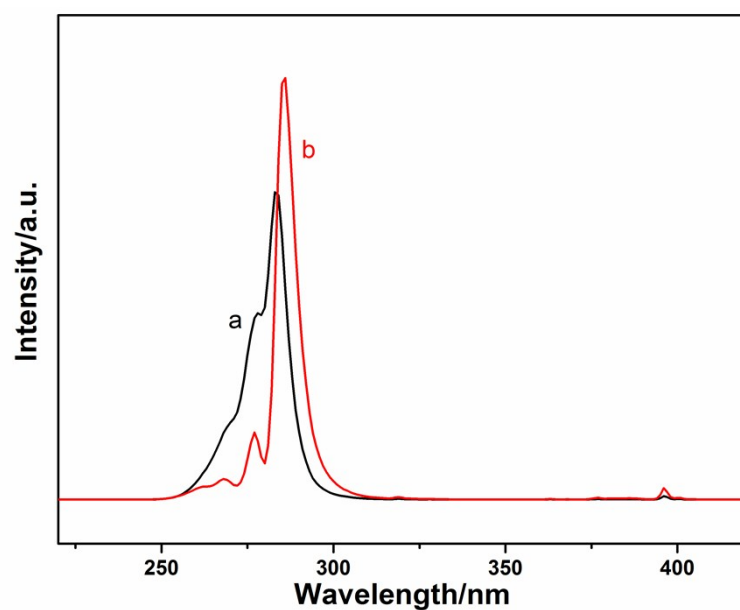

**Figure S3.** The excitation spectra of  $\text{Na}_3[\text{Ln}(\text{dpa})_3]$  (a) and  $\text{Ln}(\text{dpa})_3\text{-tpy-mim}_2$  (b).

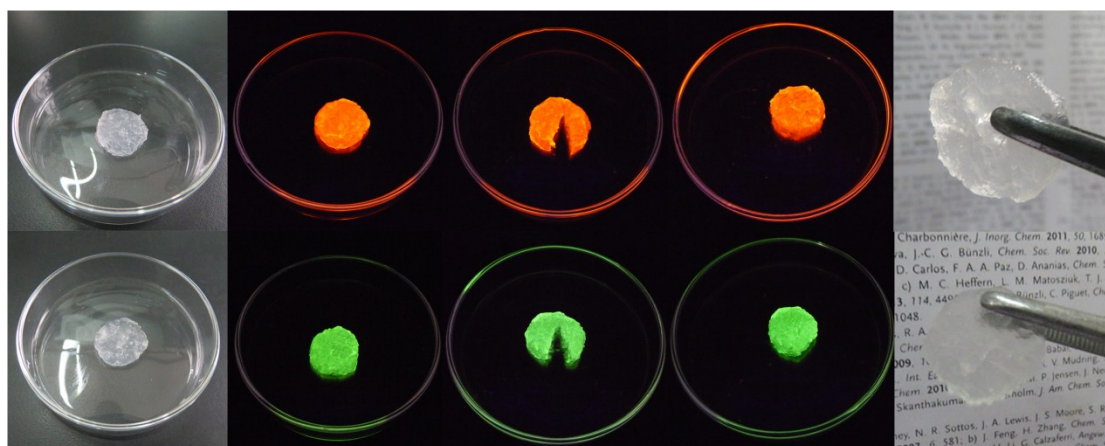

**Figure S4.** Pictures of  $\text{Ln}\cdot\mathbf{1}$  ( $\text{Ln}=\text{Eu}, \text{Tb}$ ) under 254 nm UV lamp illumination and daylight. (Red:  $\text{Eu}\cdot\mathbf{1}$ ; Green:  $\text{Tb}\cdot\mathbf{1}$ ).

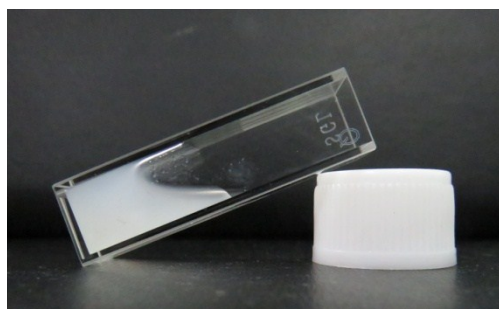

**Figure S5.** Digital photo of  $\text{Ln-tpy-mim}_2$  aqueous solution with ASAP exfoliated clay

nanosheets. Ascribe to the lack of spherical micelles, no gelation was observed.

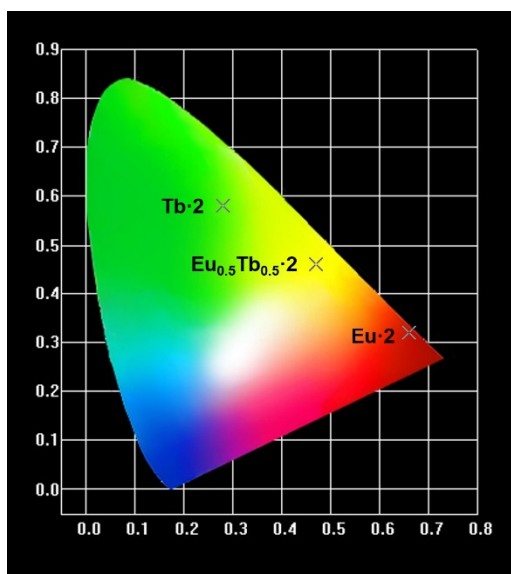

**Figure S6.** CIE 1931 chromaticity diagram within the coordinates of **Ln·2** (Ln=Eu, Tb, or Eu and Tb in molar ratio as 1:1) under 254 nm UV lamp illumination.

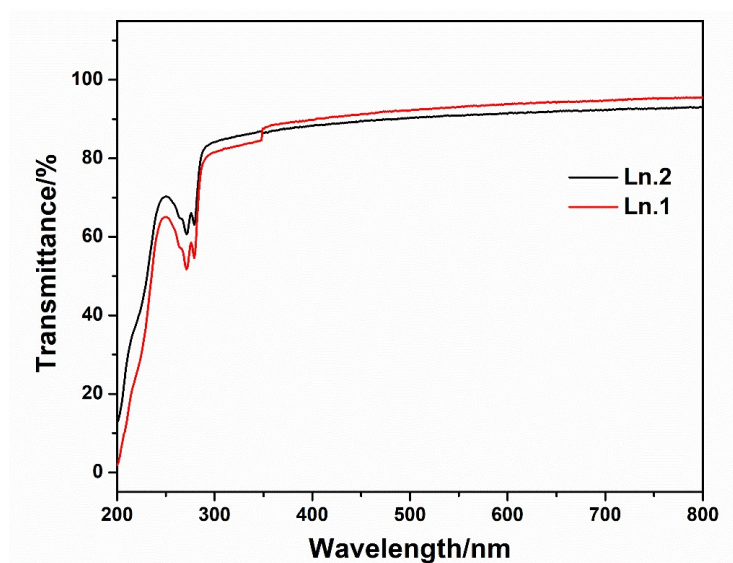

**Figure S7.** UV-vis transmittance spectra of PVA-containing hydrogels **Ln·2** (black) and PVA-free analogues **Ln·1** (red).

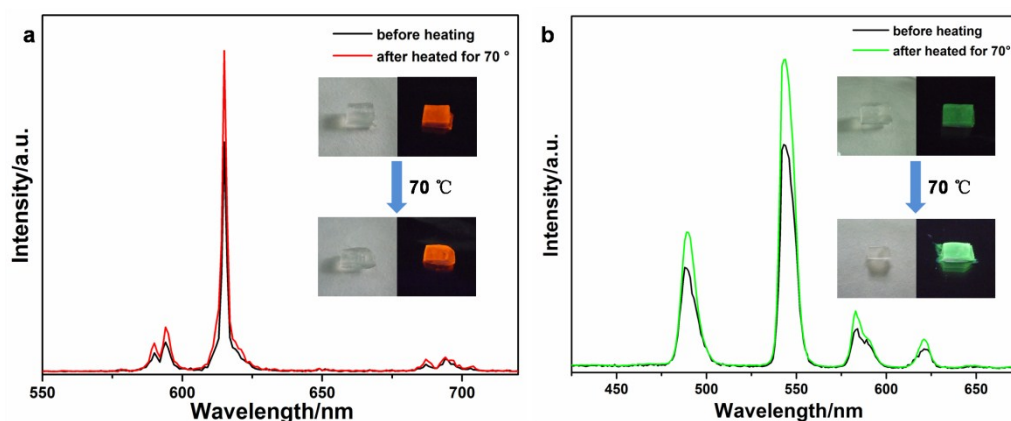

**Figure S8.** Luminescence emission spectra of hydrogels **Eu·2** (a), **Tb·2** (b) before heating and after heated to 70 °C for 10 min. Inset: Pictures of hydrogels under before heating and after heated to 70 °C for 10 min (under 254 nm UV lamp illumination).

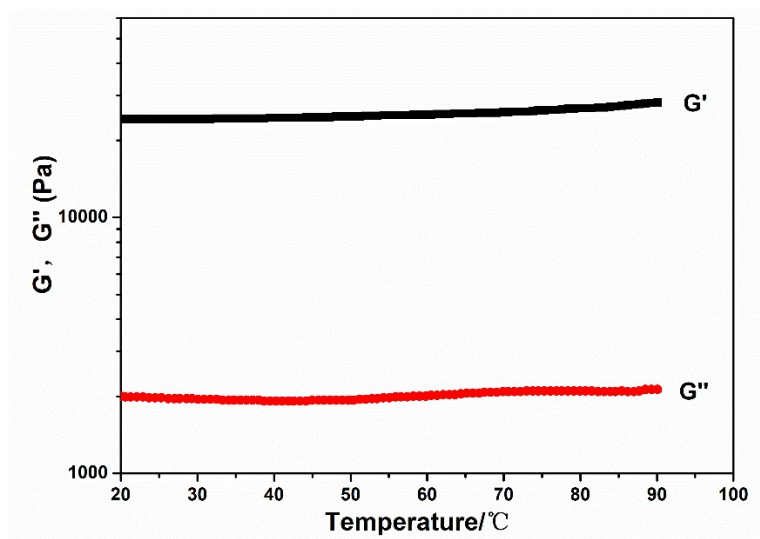

**Figure S9.** Rheological properties of **Ln·2**: Frequency ( $\omega$ ) sweep tests at  $\omega=6.28$  rad  $s^{-1}$  and strain ( $\gamma$ ) = 0.5% of the supramolecular hydrogels at varying temperature from 20 °C to 90°C.

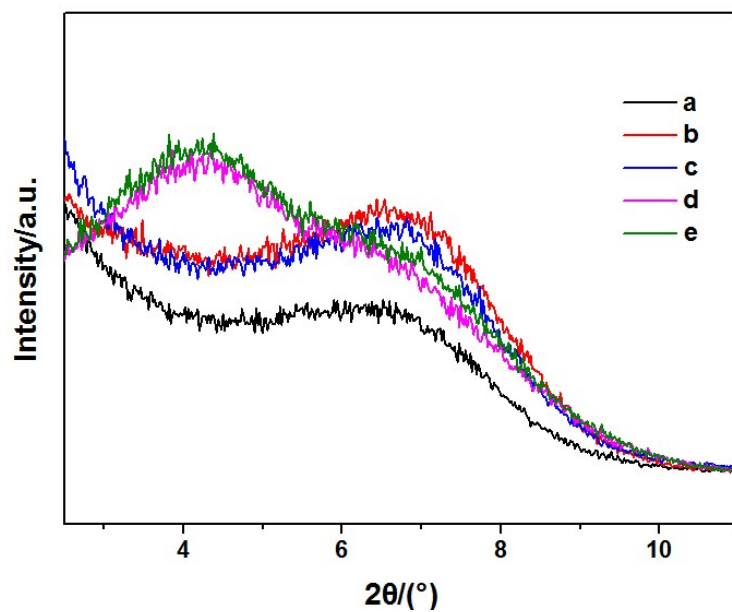

**Figure S10.** XRD spectra of pure clay (a); clay-ASAP (b); clay-PVA (c); **Ln·1** (d); **Ln·2** (e).

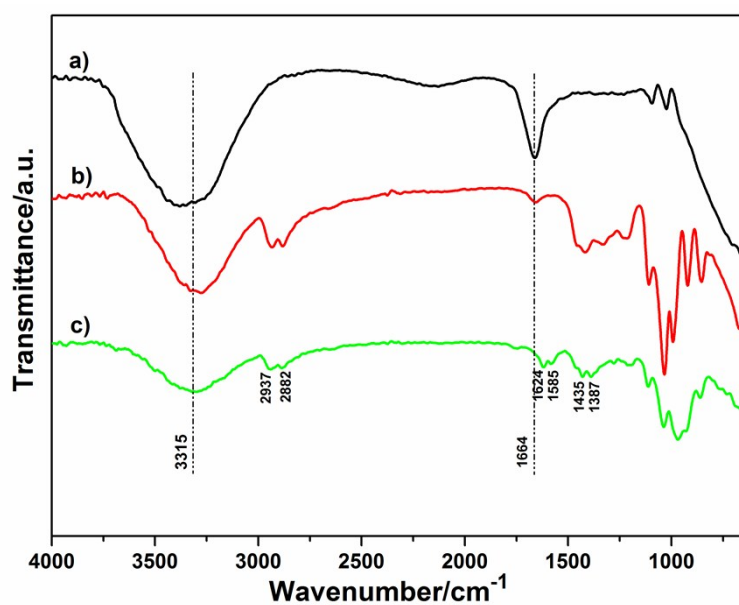

**Figure S11.** IR spectra of hydrogels **Ln·2** (a) and the resultant organogels from glycerol (b) and THF (c).
